# Supplementary material for: Dynamic alterations in decoy VEGF receptor-1 stability regulate angiogenesis
Source: PubMed Central journal article supplement (PMC5467243; doi:10.1038/ncomms15699), 2017-06-07
Supplement: ncomms15699-s1.pdf [file ncomms15699-s1.pdf]

Supplementary Figure 1

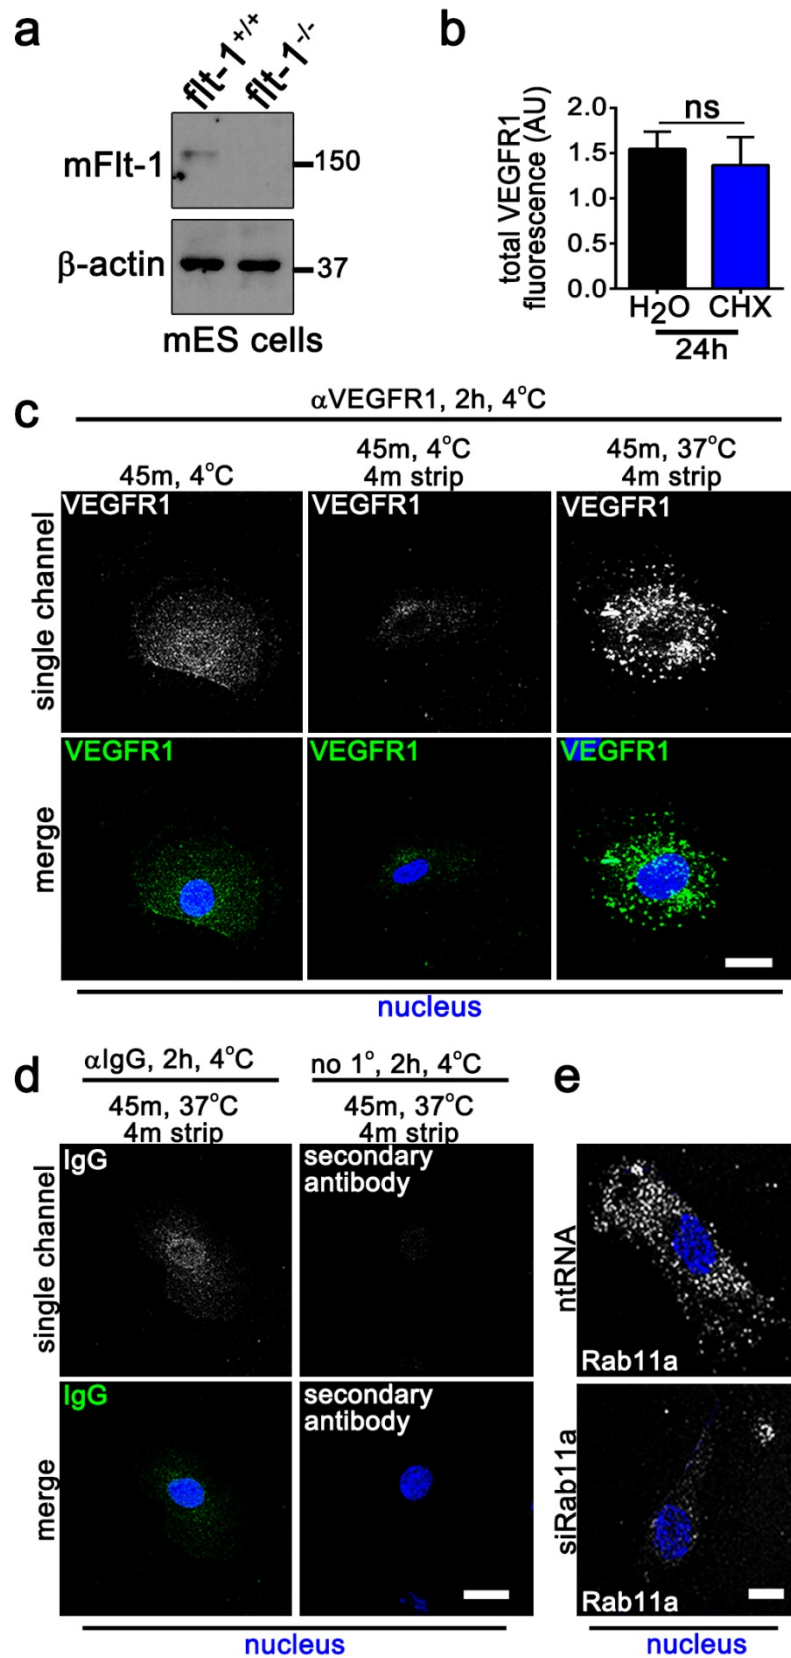

**Supplementary Figure 1 (linked to Figure 1). mVEGFR1 constitutively internalizes in endothelial cells.**

**(a)** Immunoblot of mFlt1 from undifferentiated mouse embryonic stem (ES) cells with indicated genotypes; 2 replicates.

**(b)** Quantification of VEGFR1 fluorescence intensity of HUVEC with indicated treatments via integrated density. (n=44/control; n=42/CHX). CHX, cycloheximide; 2 replicates. Statistics: Shown are means + 95% CI, student's t-test with Tukey's post-hoc range test; ns, not significant.

**(c-d)** Immunofluorescence of VEGFR1 from HUVEC internalization assay with indicated treatments. Strip: 0.2M acetic acid, 4min; 3 replicates.

**(e)** Rab11a immunofluorescence in HUVEC with indicated treatments. DRAQ7 (nuclei); 2 replicates. All scale bars: 20 $\mu$ m.

## Supplementary Figure 2

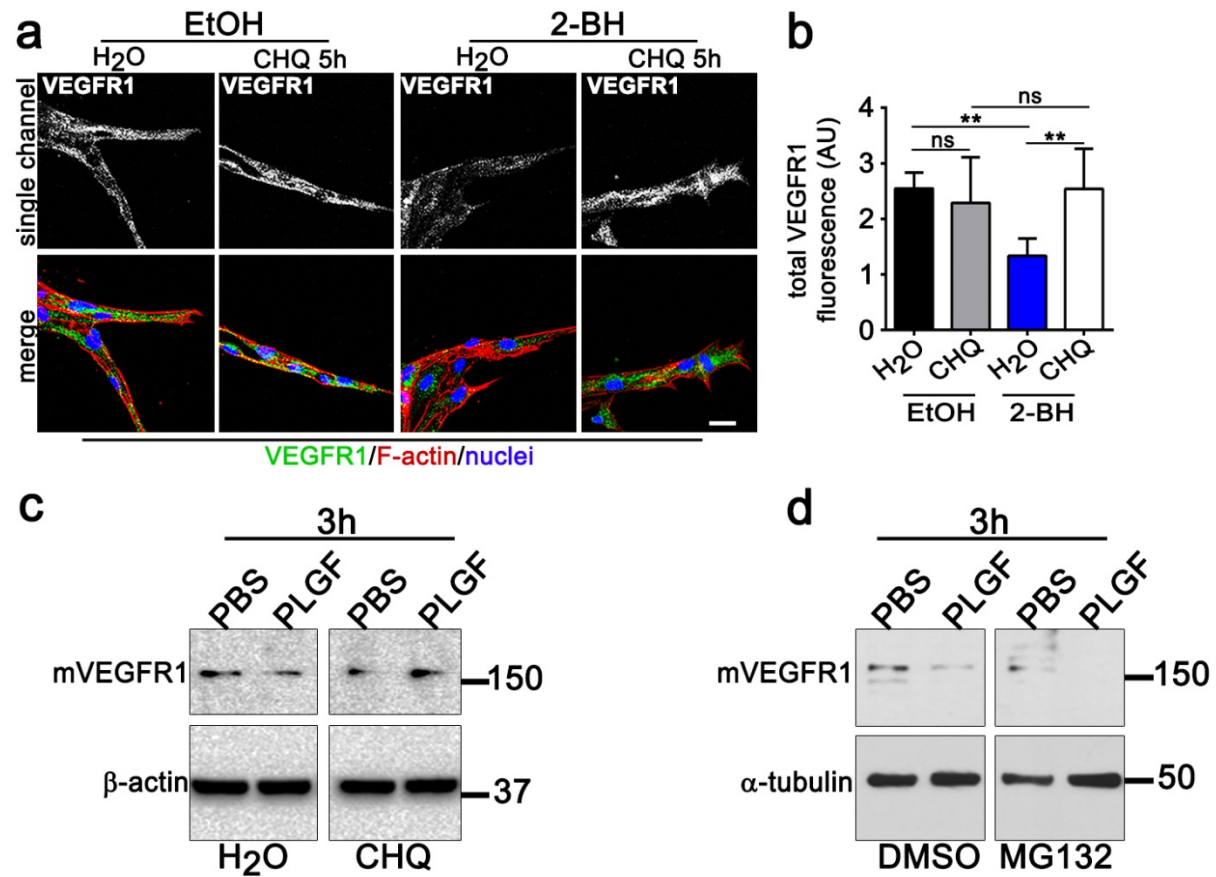

**Supplementary Figure 2 (linked to Figure 2). Destabilized mVEGFR1 degrades via the lysosome.**

**(a-b)** (a) VEGFR1 immunofluorescence of d5 HUVEC angiogenic sprouts treated with 2-BH for 12h prior to CHQ for 5h, scale bar: 25 $\mu$ m. (b) Quantification of VEGFR1 fluorescence via integrated density. Shown are means + 95% CI (#sprouts; EtOH/H<sub>2</sub>O, n=6; EtOH/CHQ, n=6; 2-BH/H<sub>2</sub>O, n=8; 2-BH/CHQ, n=5); 2-BH, 2-bromohexadecadnoic acid; CHQ, chloroquine; 2 replicates. Statistics: one-way ANOVA and pairwise comparison with post-hoc Tukey's range test. \*\*, p $\leq$ 0.01; ns, not significant.

**(c-d)** Immunoblot of HUVEC with indicated treatments, 3 replicates.

## Supplementary Figure 3

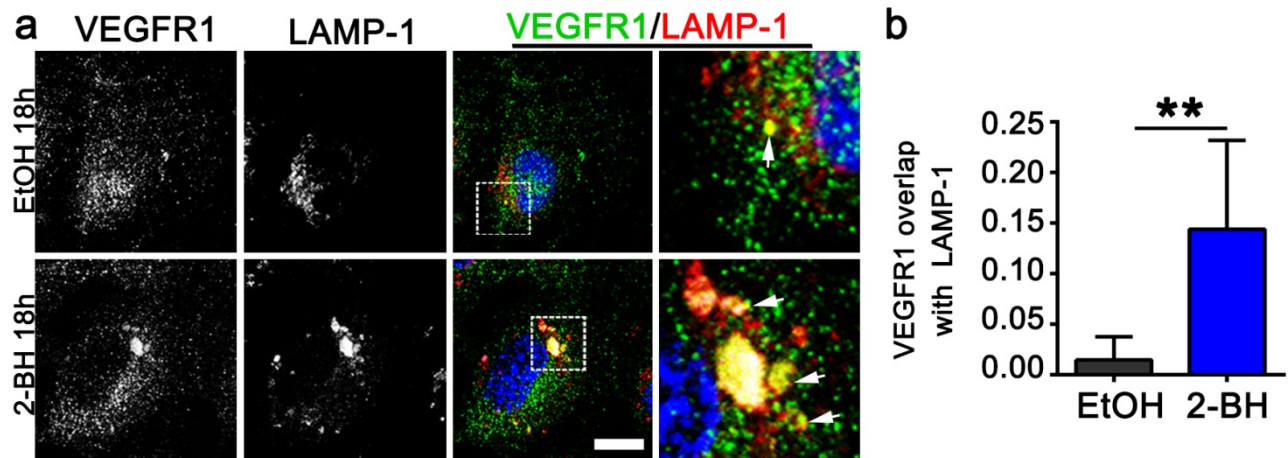

**Supplementary Figure 3 (linked to Figure 3). Palmitoylation regulates mVEGFR1 localization with lysosomes.**

**(a-b)** (a) VEGFR1 and LAMP-1 (lysosome marker) immunofluorescence of HUVEC with indicated treatments and (b) Mander's Correlation Coefficient quantification of VEGFR1 overlap with LAMP-1. (#cells: EtOH, n=38; 2-BH, n=36); 3 replicates, scale bar: 10 $\mu$ m.

**Statistics:** Shown are means +95% CI. Pairwise comparison with post-hoc Tukey's range test. \*\*,  $p \leq 0.01$ .

## Supplementary Figure 4

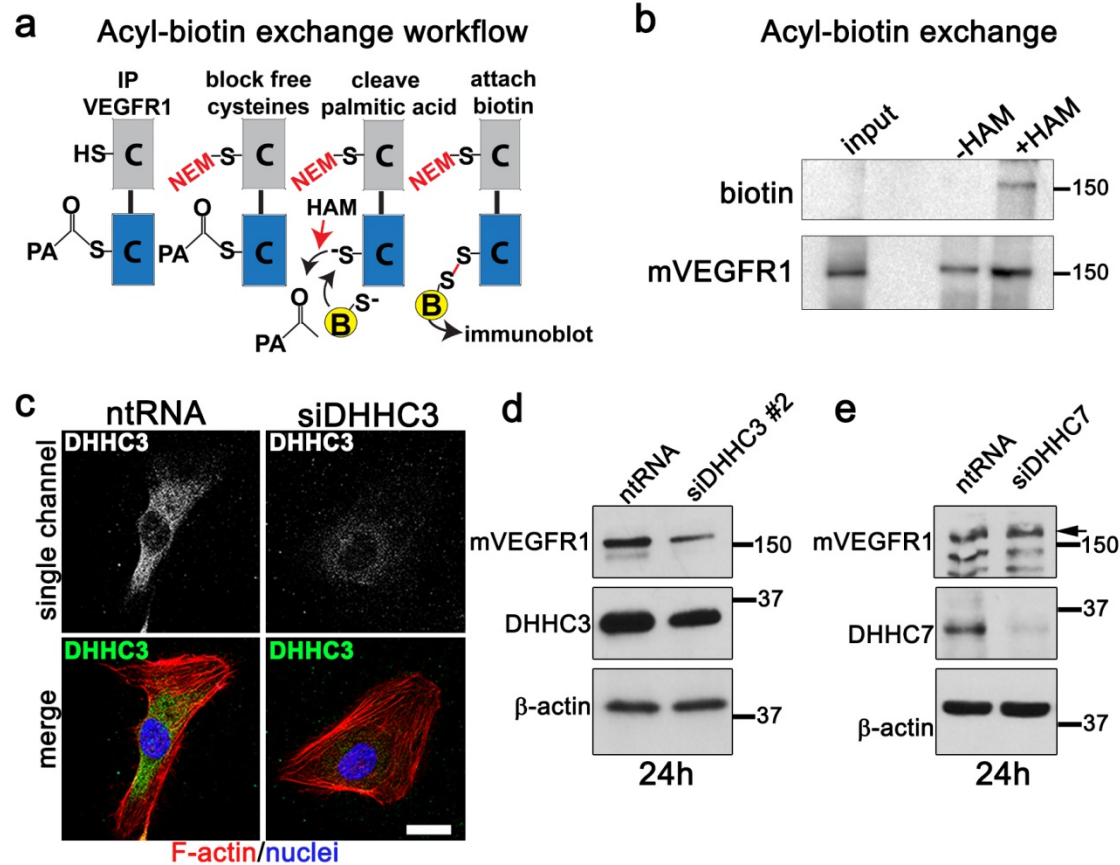

**Supplementary Figure 4 (linked to Figure 4). Knockdown of the palmitoyl acetyl transferase DHC3 reduces mVEGFR1 levels in endothelial cells.**

**(a)** Acyl-biotin exchange workflow. B, biotin; PA, palmitic acid; NEM, N-ethylmaleimide; HAM, hydroxylamine.

**(b)** Acyl-biotin exchange on immunoprecipitated VEGFR1 from HUVEC with indicated treatments, then immunoblot for biotin, stripped and reprobed for VEGFR1. HAM, hydroxylamine; 2 replicates.

**(c)** DHC3 immunofluorescence of HUVEC with indicated treatments for 24h; 2 replicates, scale bar: 20µm.

**(d-e)** Immunoblot for mVEGFR1 in HUVEC with 24h knockdown of DHC3 (d) or DHC7 (e); 3 replicates.

Supplementary Figure 5

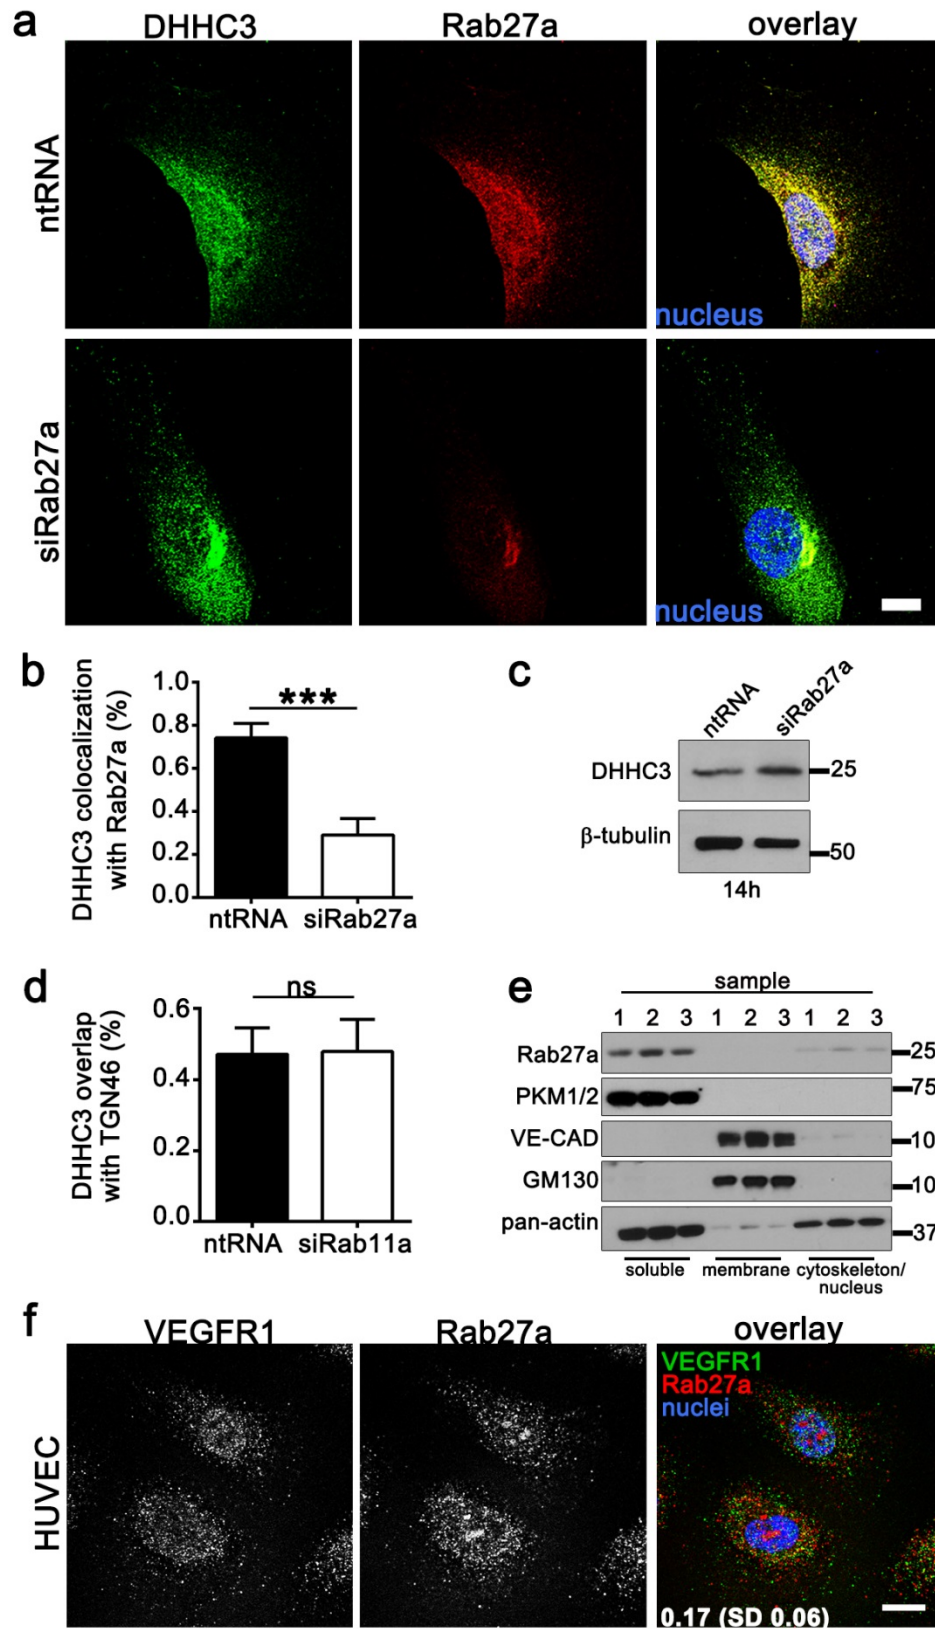

**Supplementary Figure 5 (linked to Figure 5). Rab27a and DHHC3 but not VEGFR1 colocalize in endothelial cells.**

**(a-b)** (a) Immunofluorescence of DHHC3 and Rab27a in HUVEC with indicated treatments 24h post-knockdown, scale bar: 10 $\mu$ m. (b) Mander's Colocalization Coefficient quantification of overlap. Shown are means +95% CI. (#cells: ntRNA, n=31; siRab27a, n=20); 2 replicates.

**(c)** Immunoblot of DHHC3 in HUVEC with indicated treatments.

**(d)** Mander's Colocalization Coefficient quantification of DHHC3 and TGN46 (Golgi) overlap in HUVEC with indicated treatments. Shown are means + 95% CI. (#cells: ntRNA, n=19; siRab11a, n=27); 2 replicates.

**(e)** Subcellular fractionation and immunoblot of HUVEC from 3 different lots. Pyruvate kinase1/2 (PKM1/2), soluble marker; vascular-endothelial cadherin (VE-CAD), membrane and cytoskeletal marker; cis-Golgi Marker 130 (GM130), membrane marker; pan actin, soluble (G-actin) and cytoskeletal (F-actin) marker. 2 replicates.

**(f)** Immunofluorescence of VEGFR1 and Rab27a overlap quantified with Mander's Correlation Coefficient, +/- SD, scale bar 15 $\mu$ m.

**Statistics:** Student's t-test with post-hoc Tukey's range test. \*\*\*,  $p \leq 0.001$ ; ns, not significant.

Supplementary Figure 6

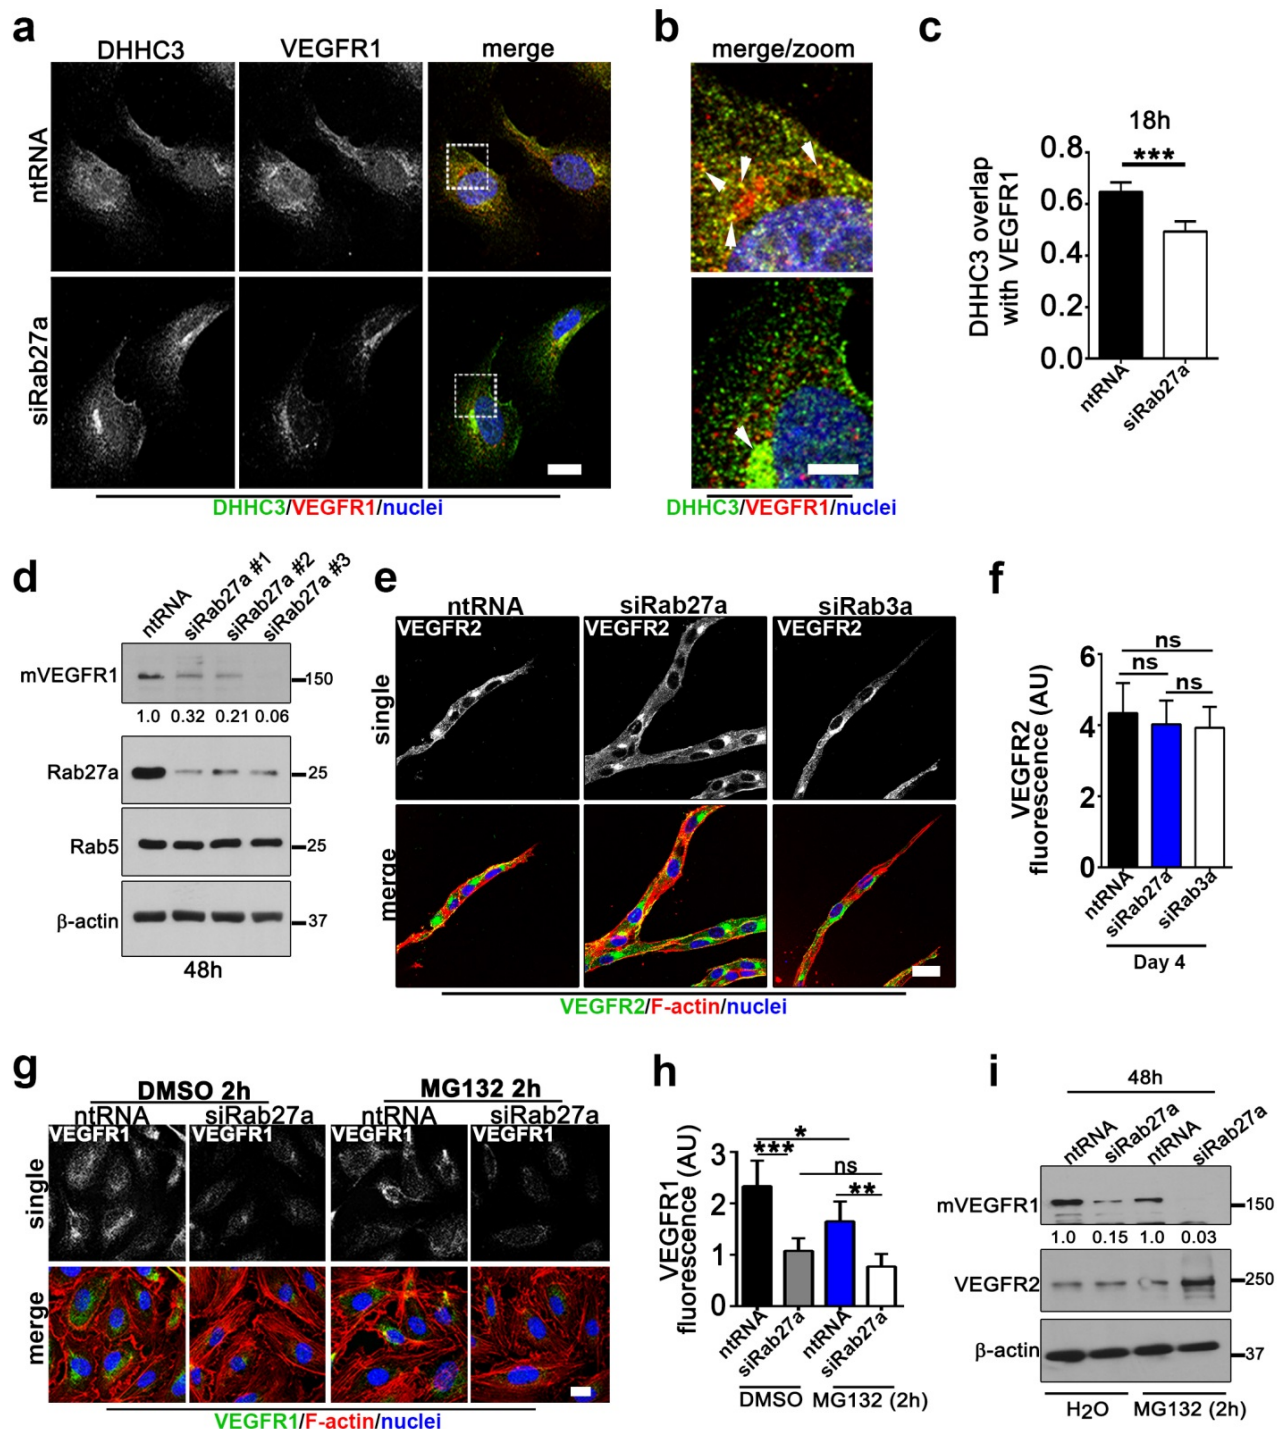



**Supplementary Figure 6 (linked to Figure 5). Rab27a regulates steady-state mVEGFR1 levels.**

**(a-c)** (a-b) Immunofluorescence of DHHC3 and VEGFR1 in HUVEC with indicated treatments, scale bars: 10 $\mu$ m (a) and 5 $\mu$ m (b). (c) Mander's Colocalization Coefficient quantification of fluorescence. (#cells: ntRNA, n=33, siRab27a, n=40); 3 replicates.

**(d)** Immunoblot of HUVEC with indicated treatments. Values are relative mVEGR1 levels.

**(e-f)** (e) VEGFR2 immunofluorescence and (f) quantification of fluorescence via integrated density of d4 HUVEC angiogenic sprouts with indicated treatments. Scale bar: 20 $\mu$ m, (#sprouts: ntRNA, n=10; siRab27a, n=12; siRab3a, n=7); 3 replicates.

**(g-h)** (g) VEGFR1 immunofluorescence of HUVEC 48h post KD and (h) quantification of fluorescence via integrated density, scale bar 15 $\mu$ m. (# cells: DMSO/ntRNA, n=14; MG132/ntRNA, n=18; DMSO/siRab27a, n=14; MG132/siRab27a, n=16); 2 replicates.

**(i)** Immunoblot of HUVEC with indicated treatments. Values are relative mVEGR1 levels; 2 replicates.

**Statistics:** Shown are means +95% CI. One-way ANOVA and pairwise comparison with post-hoc Tukey's range test. \*,  $p \leq 0.05$ ; \*\*,  $p \leq 0.01$ ; \*\*\*,  $p \leq 0.001$ ; ns, not significant.

## Supplementary Figure 7

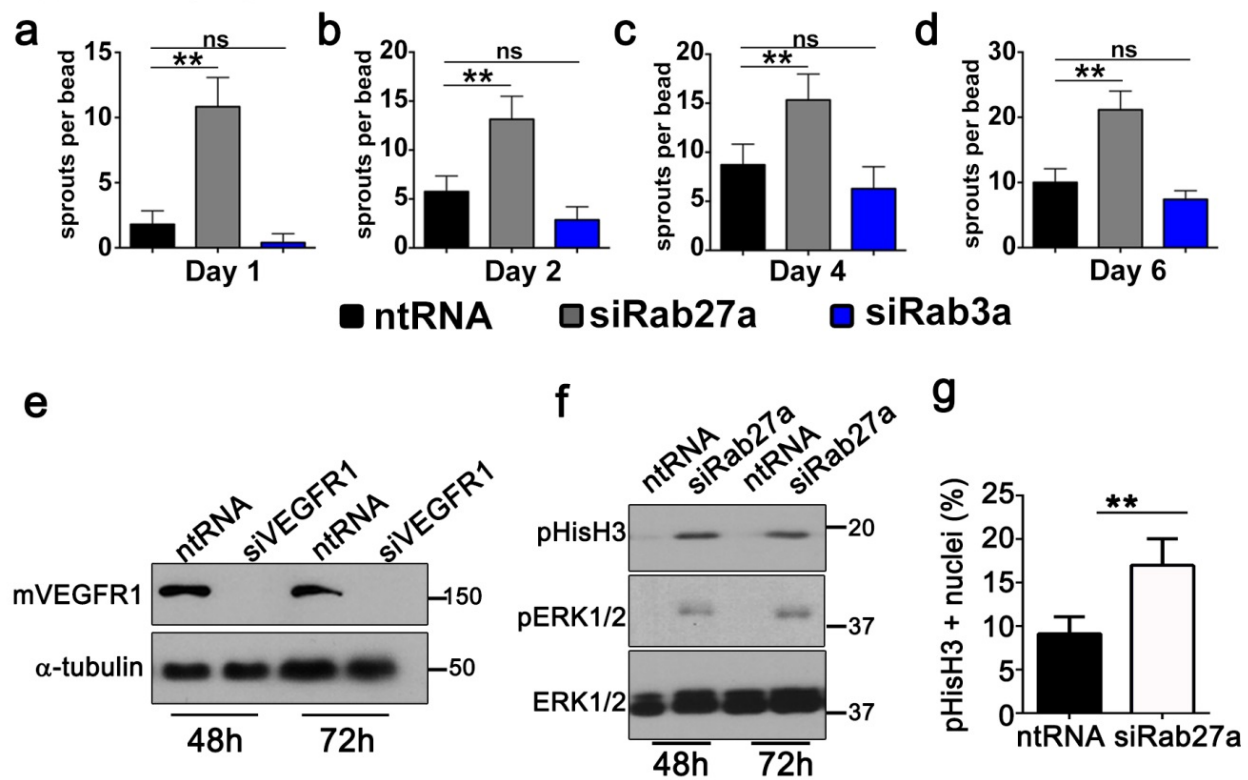

**Supplementary Figure 7 (linked to Figures 6 and 7). Rab27a negatively regulates angiogenesis and increases HUVEC proliferation.**

**(a-d)** Quantification of sprouting from HUVEC with indicated treatments on indicated days. (n=10 beads/condition/time point); 3 replicates.

**(e)** Immunoblot of HUVEC with indicated treatments and times; 2 replicates.

**(f)** Immunoblot of HUVEC with indicated treatments and times; 3 replicates.

**(g)** Quantification of pHisH3 (mitotic) nuclei of HUVEC 48h post-knockdown (#nuclei: ntRNA, n=682; siRab27a, n=549); 2 replicates.

**Statistics:** (a-d) Shown are means +95% CI. One-way ANOVA and pairwise comparison with post-hoc Tukey's range test. (g) Shown are means +SEM, Student's *t*-test. \*\*,  $p \leq 0.01$ ; ns, not significant.

Supplementary Figure 8

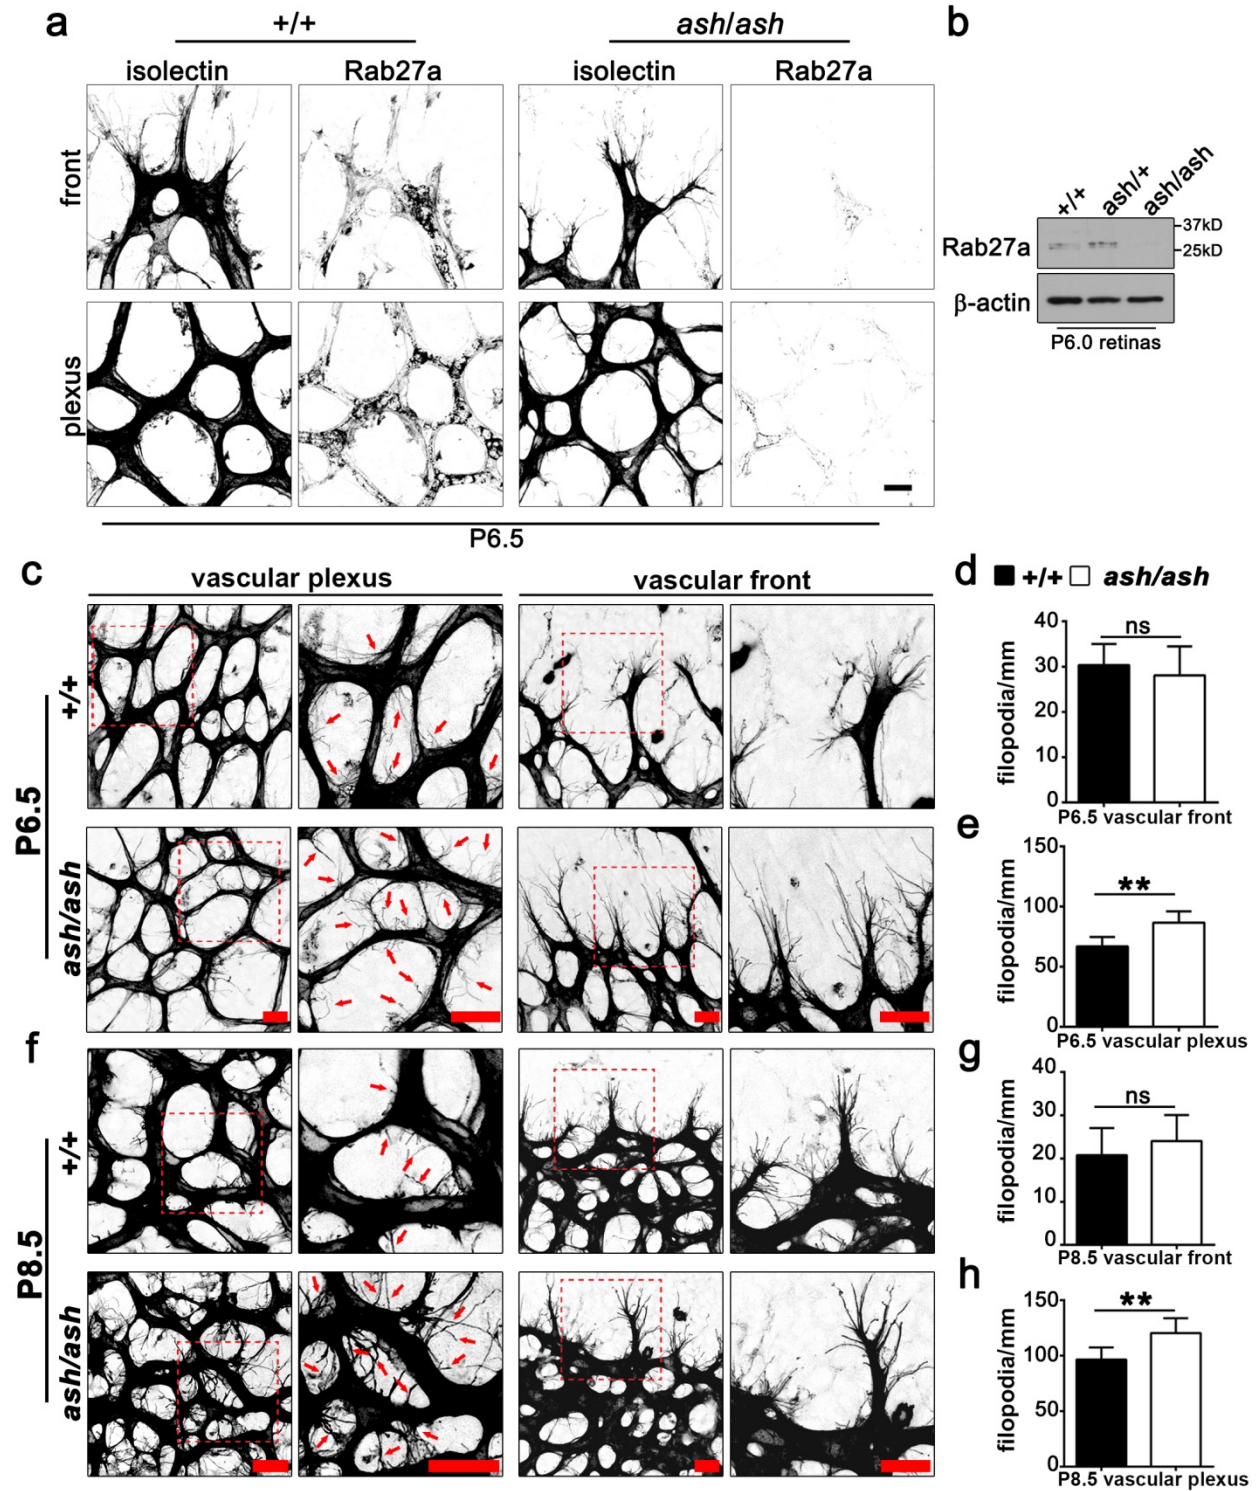

**Supplementary Figure 8 (linked to Figure 8). Loss of Rab27a protein in *ash/ash* mice leads to hyperactive retinal blood vessels.**

**(a)** Immunofluorescence of P6.5 mouse retinas for vessels (isolectin) and Rab27a of indicated genotypes; 3 replicates, scale bar: 15 $\mu$ m.

**(b)** Immunoblot of Rab27a from P6.0 retinal lysates of indicated genotypes; 4 replicates.

**(c-e)** **(c)** Immunofluorescence of P6.5 retinal vessels with indicated genotypes.

Filopodia were quantified at the vascular front **(d)** and within the plexus **(e)**. Red boxes, higher magnification to right. Arrows, filopodia. (#retinas: 2 independent litters: +/+, n=7; *ash/ash*, n=6).

**(f-h)** **(f)** Immunofluorescence of P8.5 retinal vessels with indicated genotypes. Filopodia were quantified at the vascular front **(g)** and within the plexus **(h)**. Red boxes, higher magnification to right. Arrows, filopodia. (#retinas: 2 independent litters: +/+, n=6; *ash/ash*, n=4).

**Statistics:** Shown are means +95% CI. Students *t*-test. \*,  $p \leq 0.05$ ; \*\*,  $p \leq 0.01$ ; \*\*\*,  $p \leq 0.001$ ; ns, not significant. Scale bars, 25 $\mu$ m.

Supplementary Figure 9

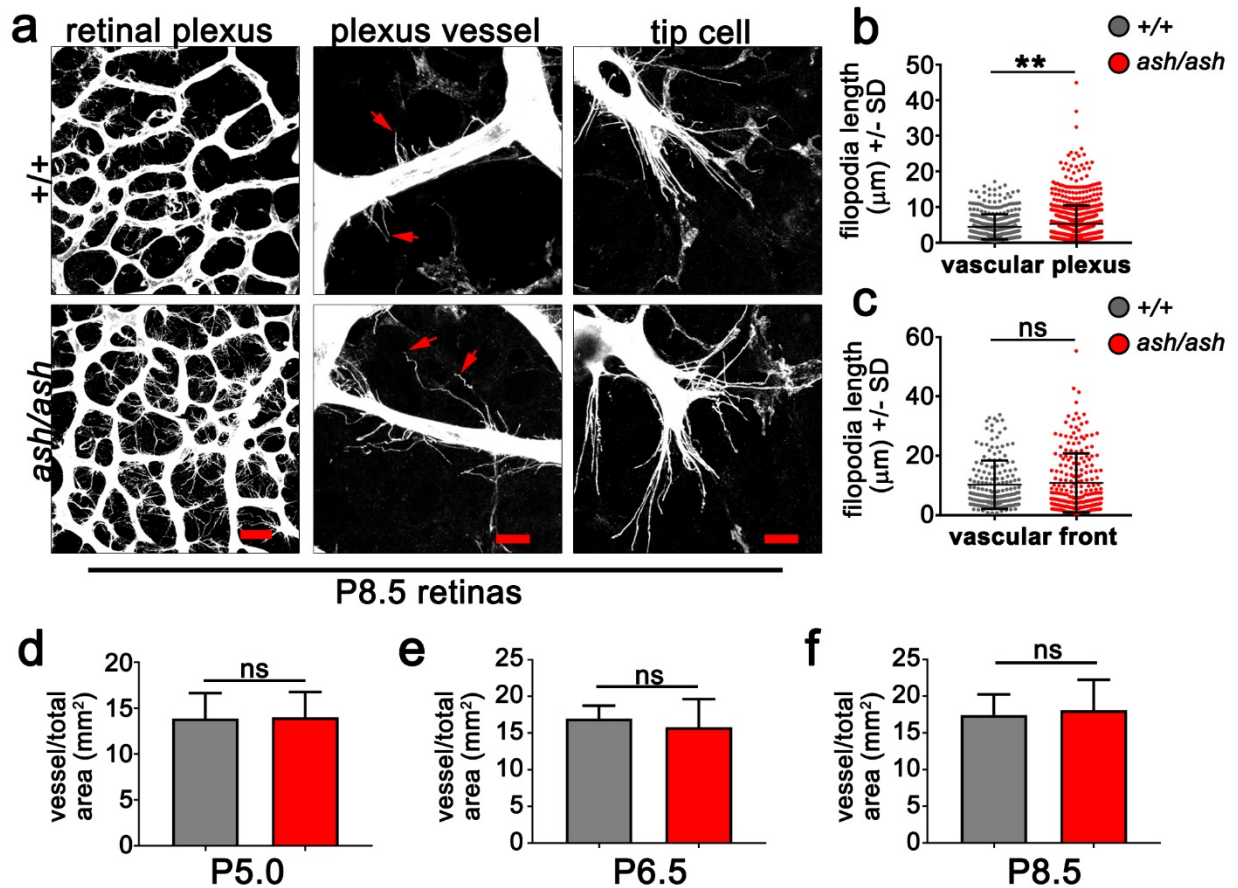

**Supplementary Figure 9 (linked to Figure 8). Retinal vessels from *ash/ash* mice have longer plexus filopodia and model for regulation of mVEGFR1 stability.**

(a-c) (a) Immunofluorescence of filopodia in P8.5 retinal vessels of indicated genotypes (left, low magnification plexus, scale bar, 25 $\mu\text{m}$  left column; middle, high magnification plexus; right, high magnification tip cells, scale bars 10 $\mu\text{m}$ , middle and right columns). (b-c) Quantification of filopodia length from vascular plexus (b) and vascular front (c). (#filopodia: plexus: +/+, n=396; *ash/ash*, n=827; front: +/+, n=175; *ash/ash*, n=220); 2 independent replicates.

**Statistics:** Shown are means +95% CI. One-way ANOVA and pairwise comparison with post-hoc Tukey's range test. \*\*,  $p \leq 0.01$ ; ns, not significant.

**Supplementary Figure 10 (linked to all Figures). Uncropped Western blots.**

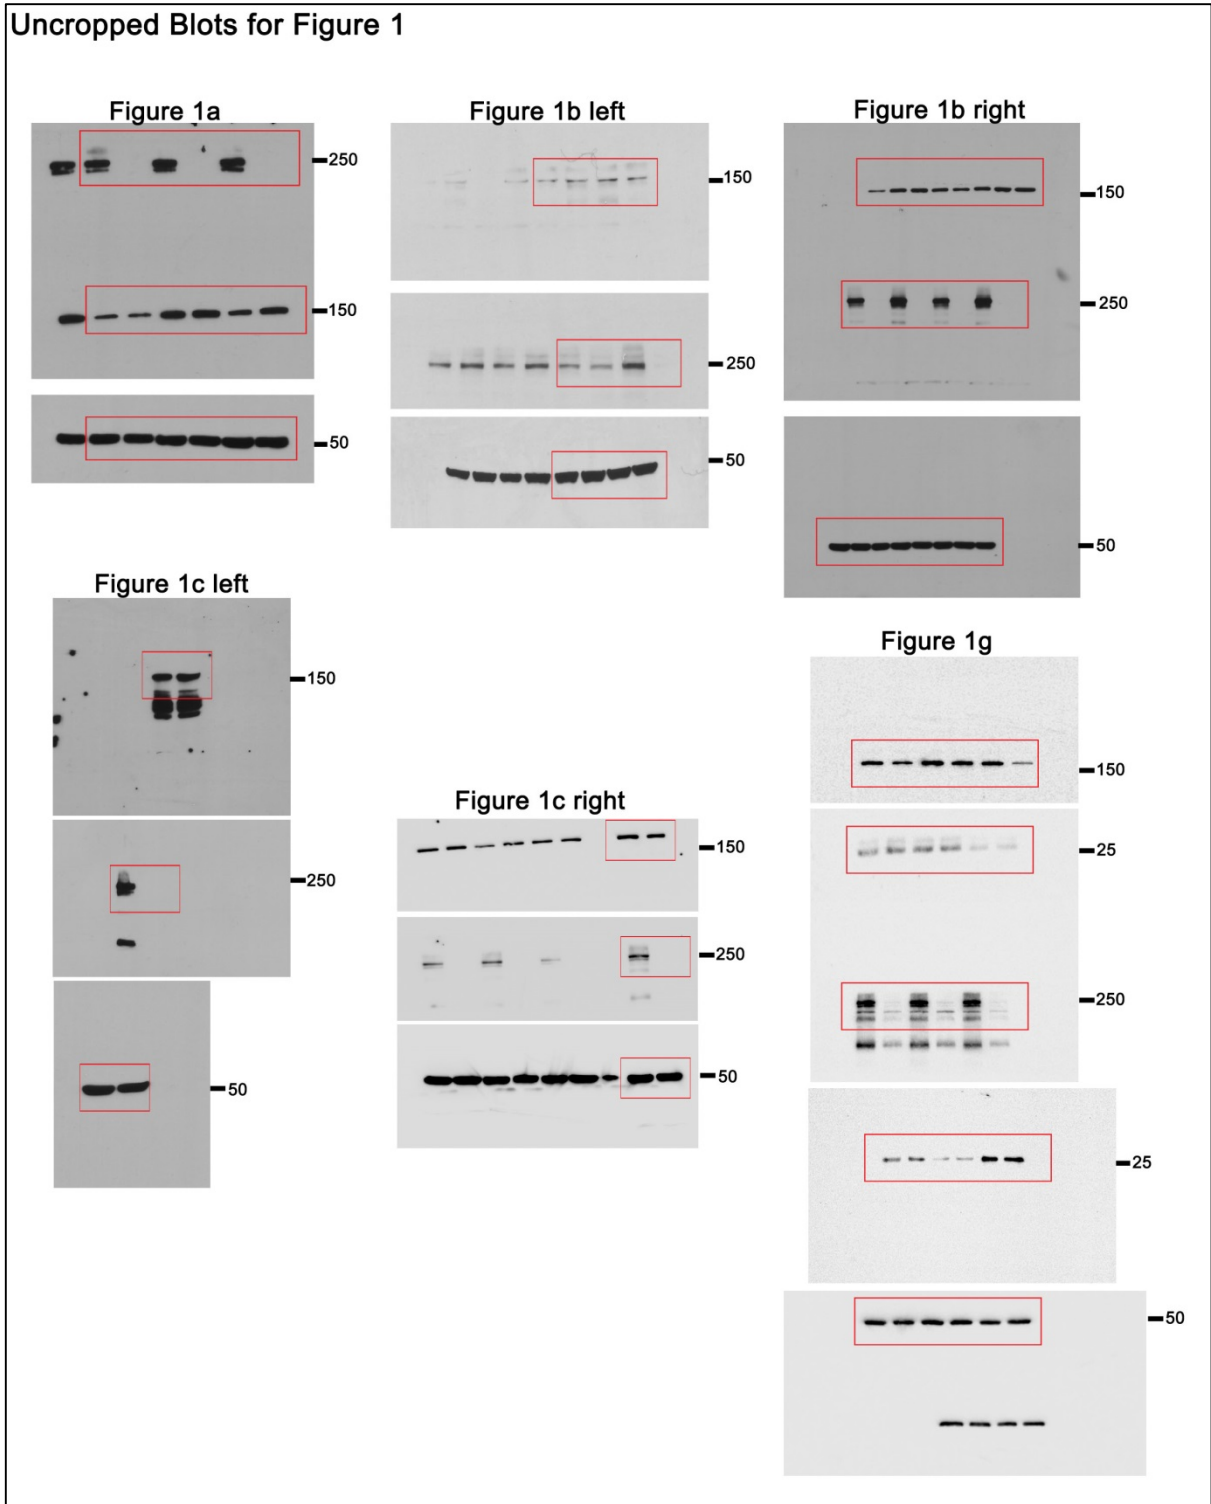

Uncropped Blots for Figure 2

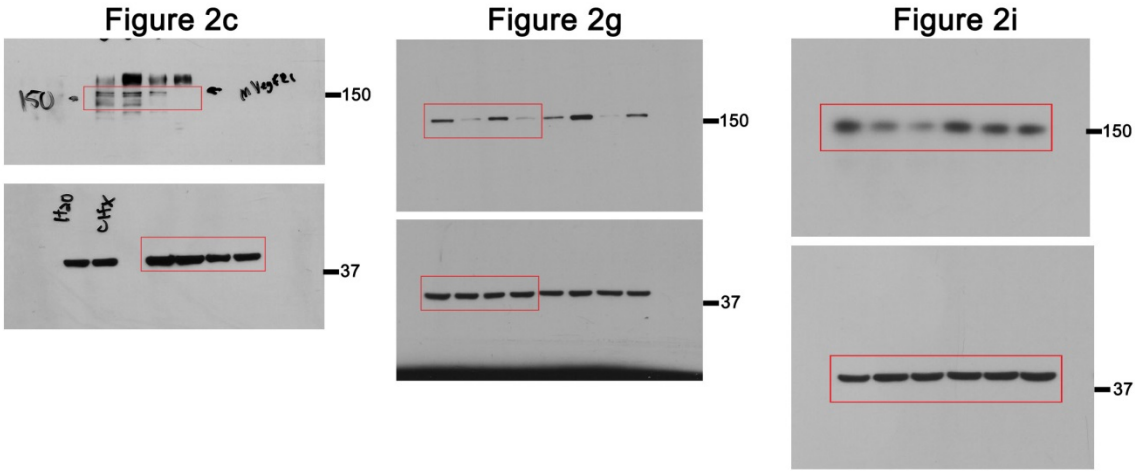

Uncropped Blots for Figure 3

Figure 3e

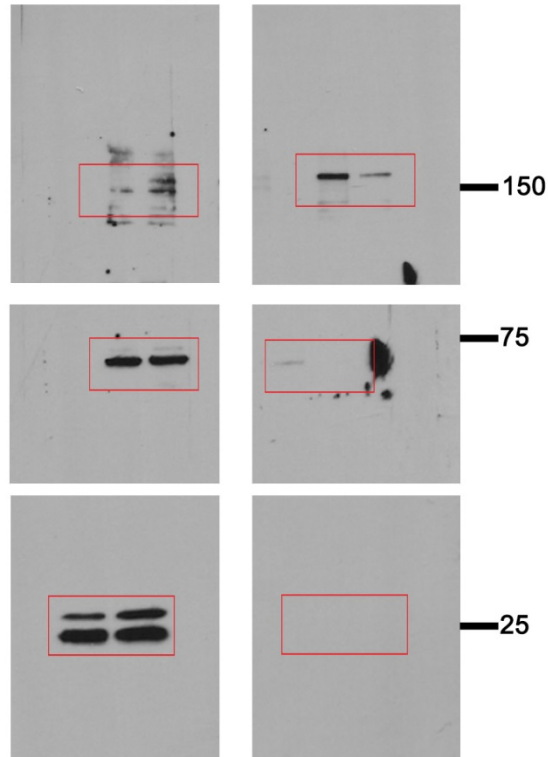



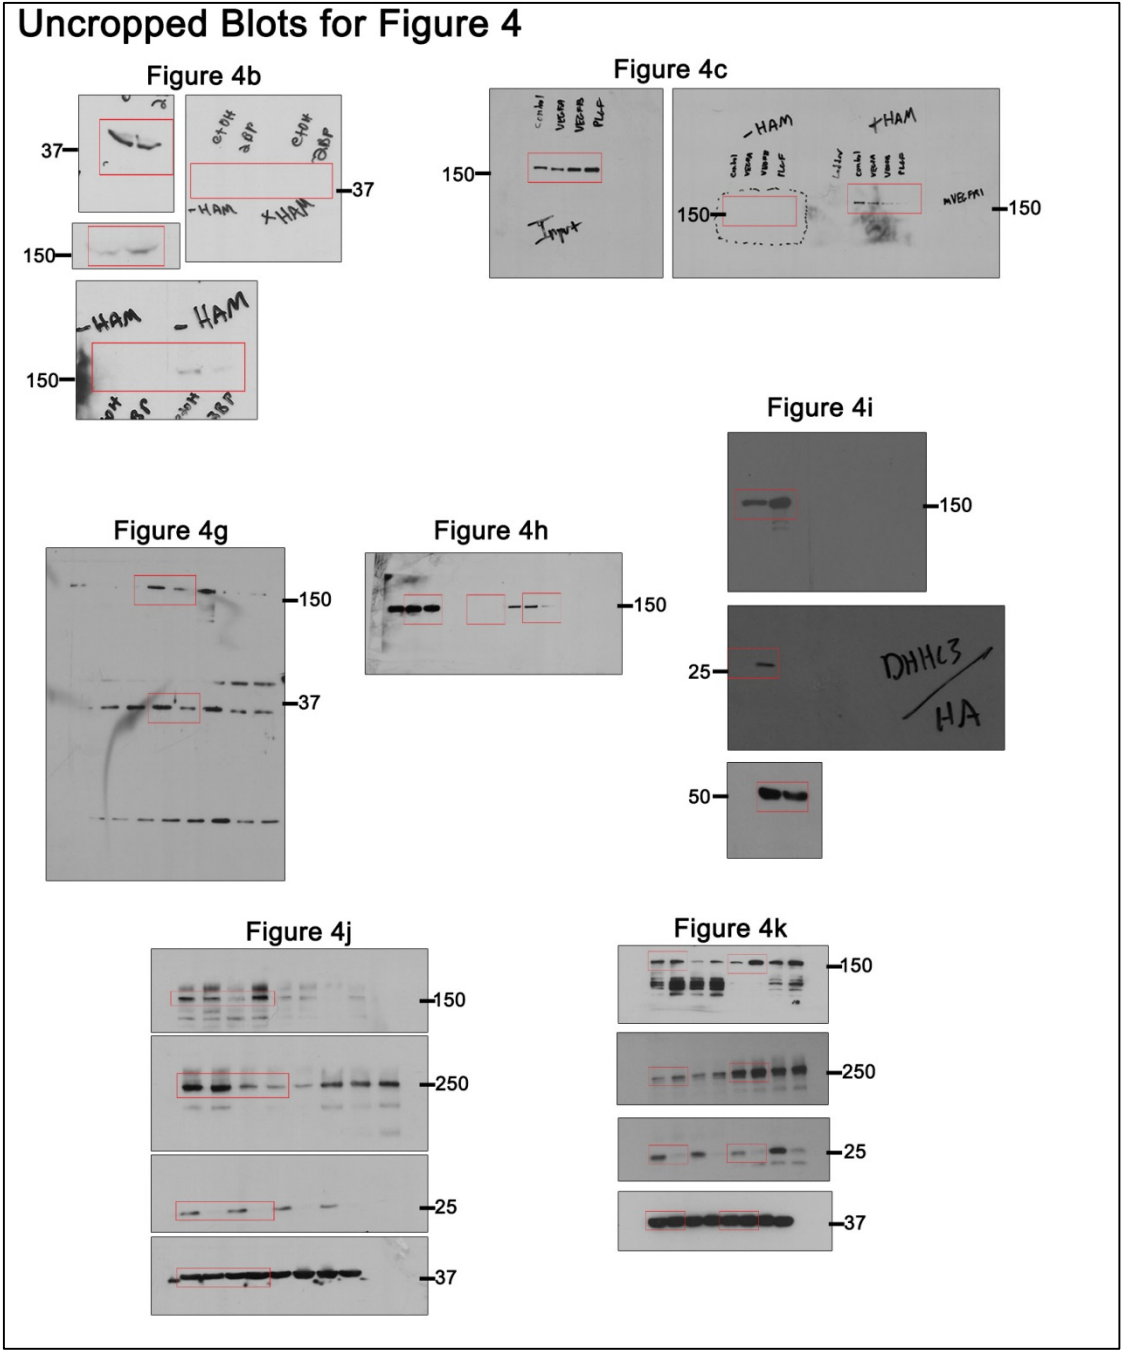

### Uncropped Blots for Figure 5

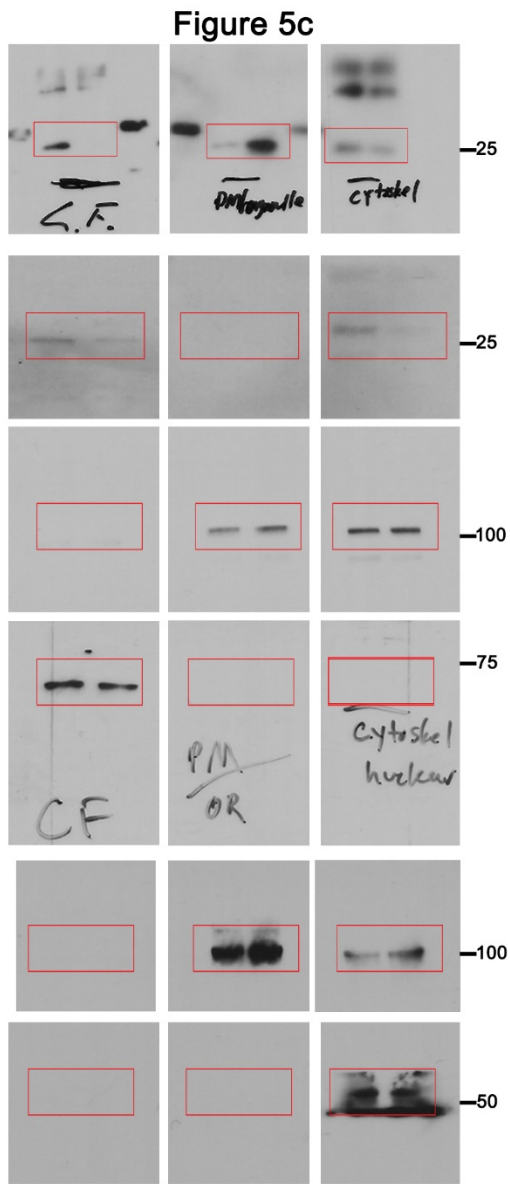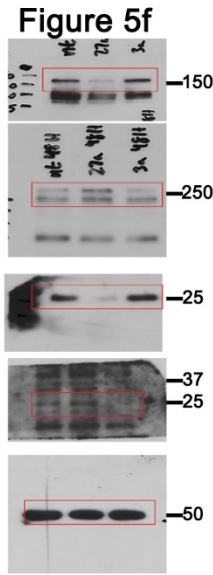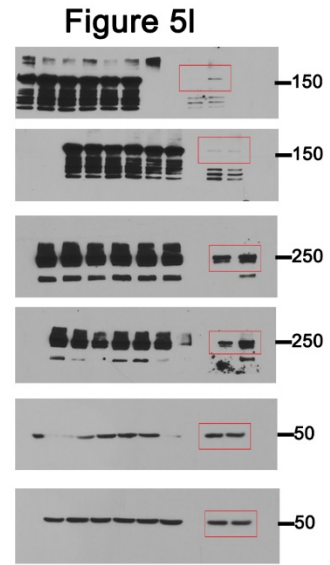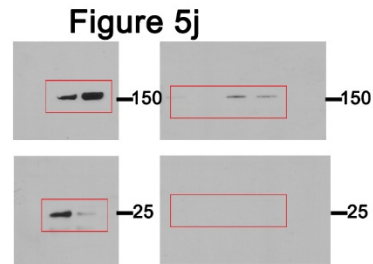

Uncropped Blots for Figure 7

Figure 7c

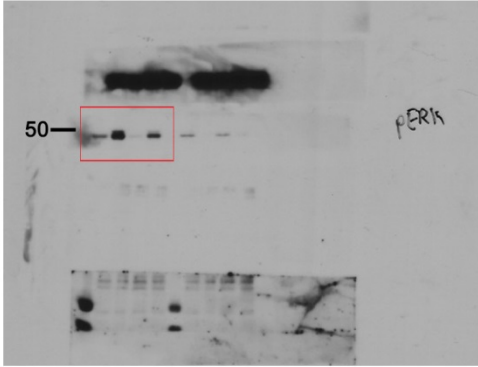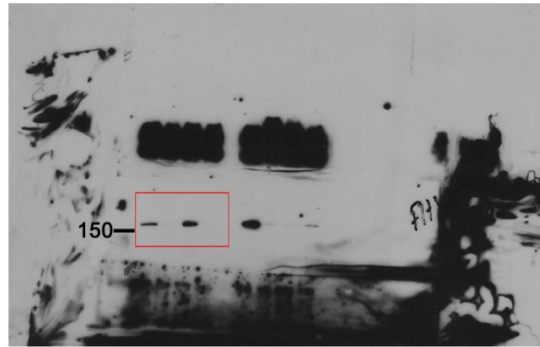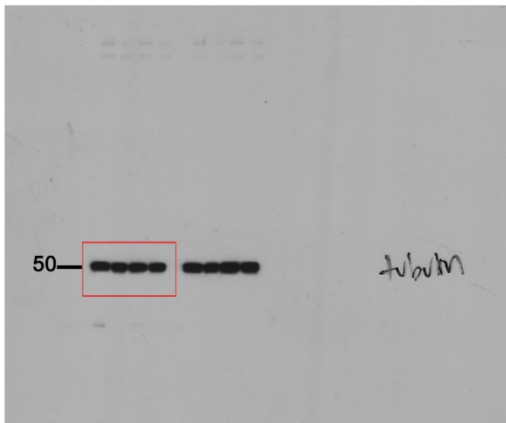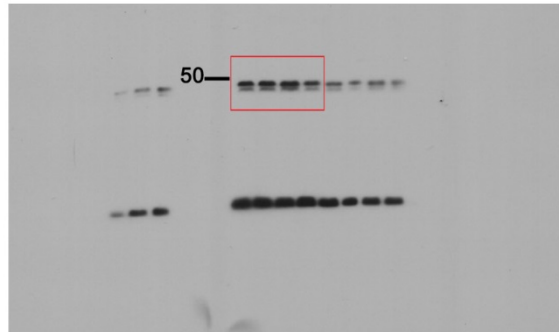

Uncropped Blots for Figure 8

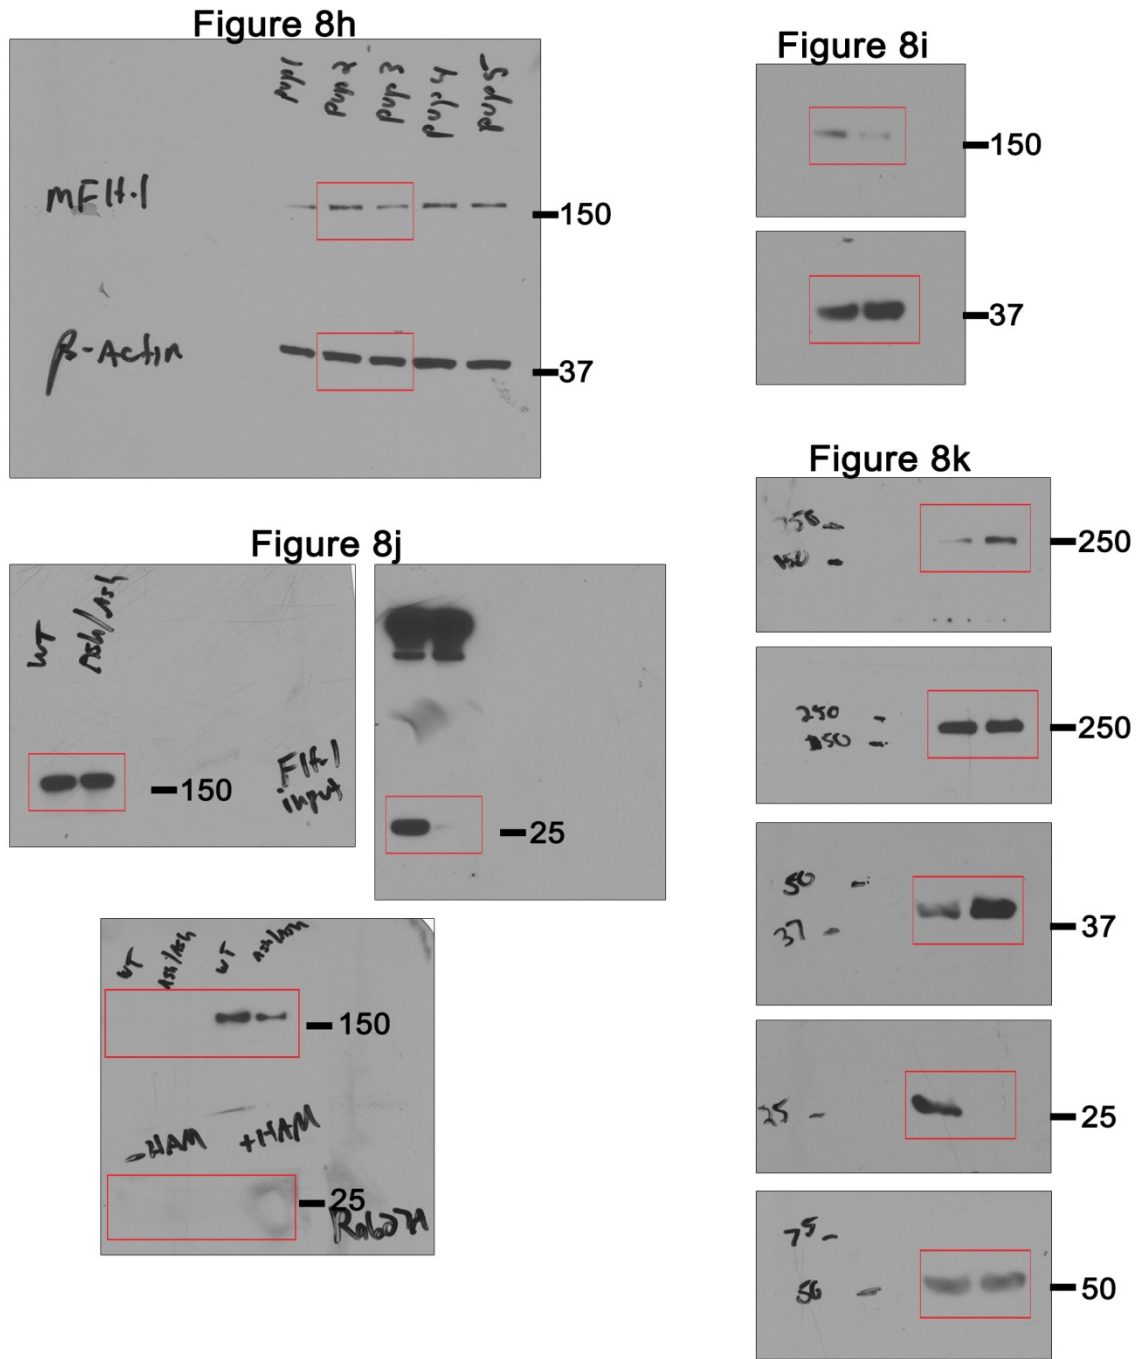

### Uncropped Blots for Supplementary Figure 1

Supplementary Figure 1a

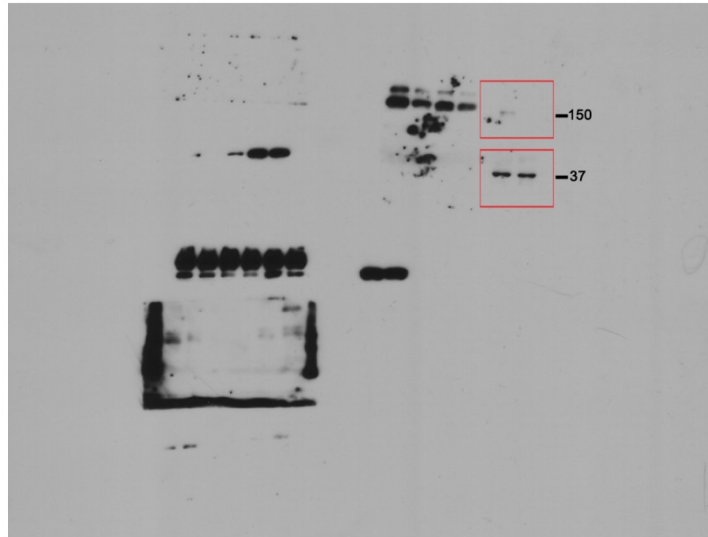

### Uncropped Blots for Supplementary Figure 2

Supplementary Figure 2c

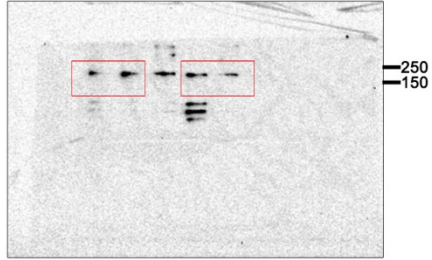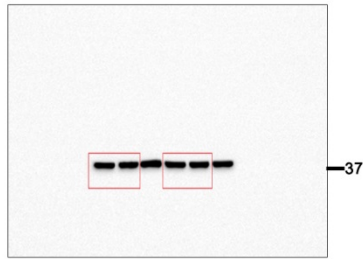

Supplementary Figure 2d

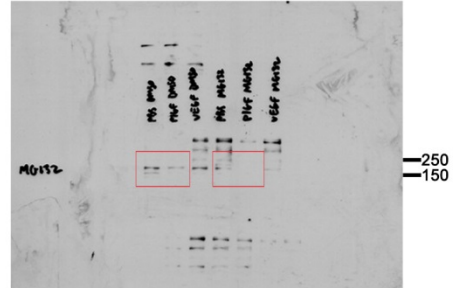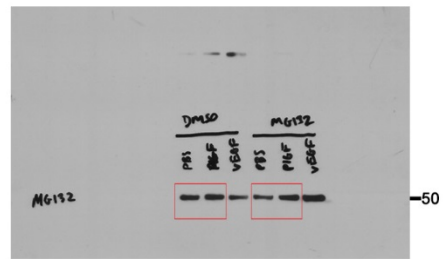

### Uncropped blots for Supplementary Figure 4

Supplementary Figure 4b

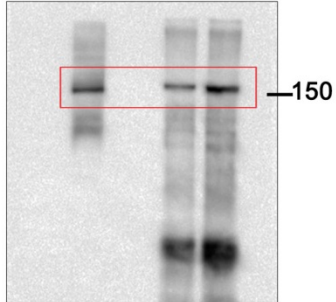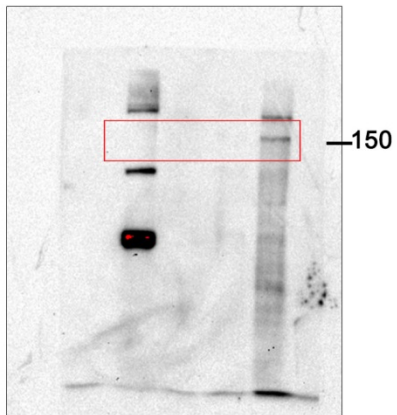

Supplementary Figure 4e

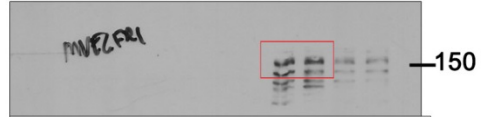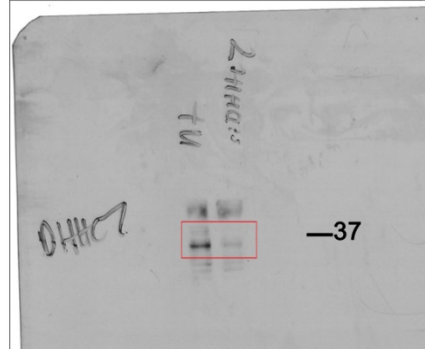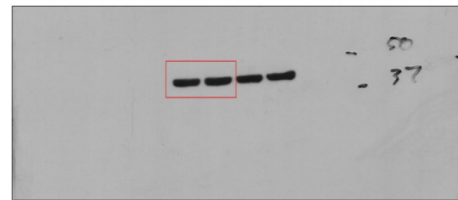

Supplementary Figure 4d

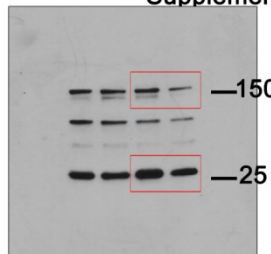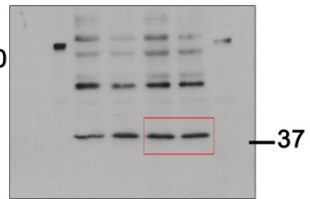

### Uncropped Blots for Supplementary Figure 5

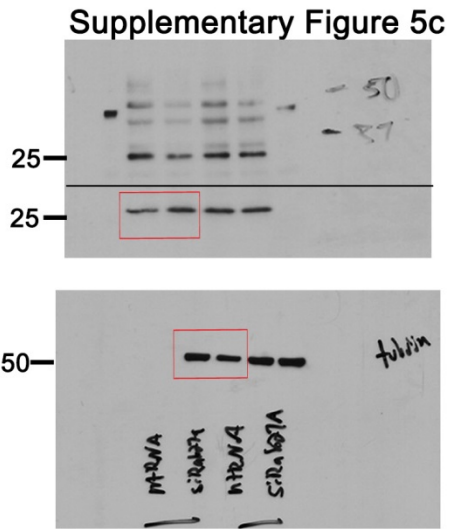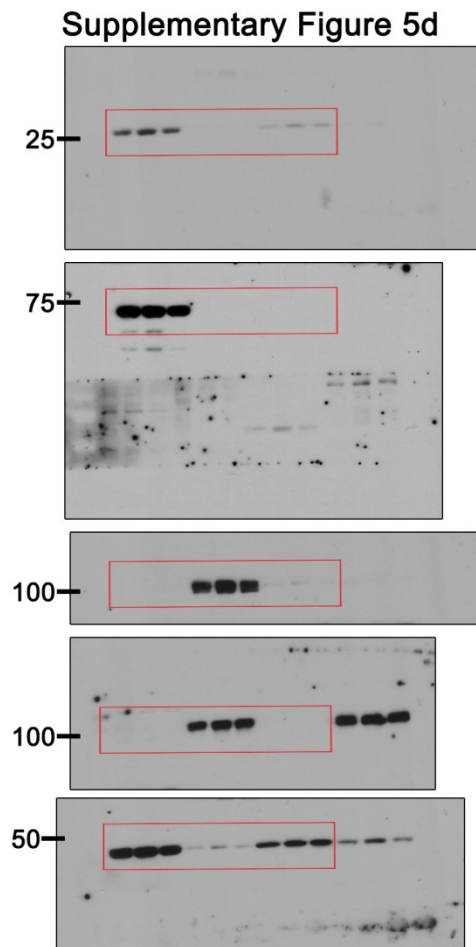



Uncropped Blots for Supplementary Figure 6

Supplementary Figure 6d

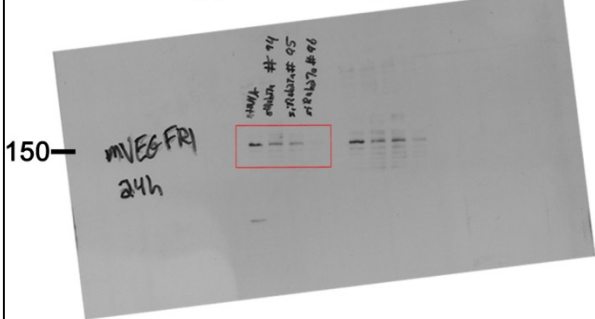

Supplementary Figure 6i

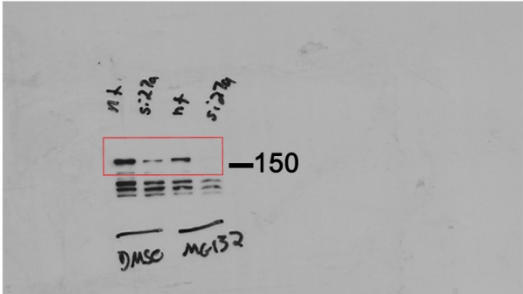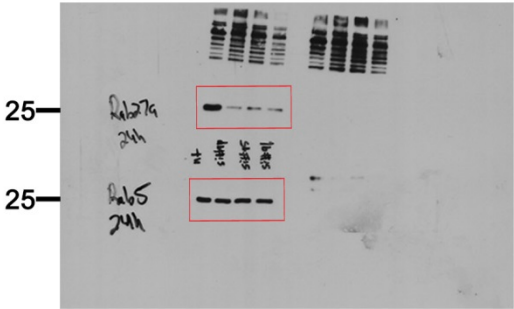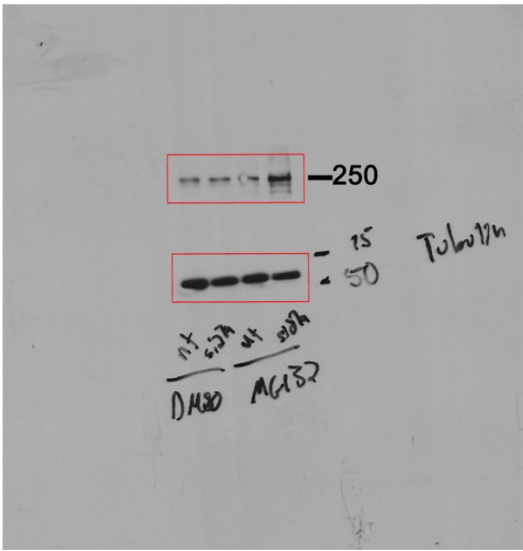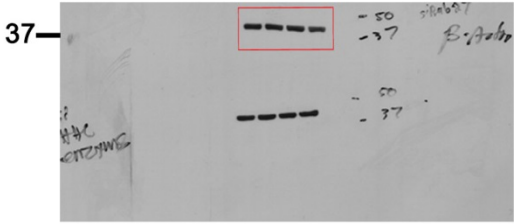

### Uncropped Blots for Supplementary Figure 7

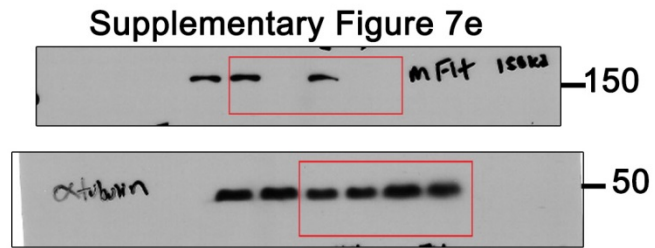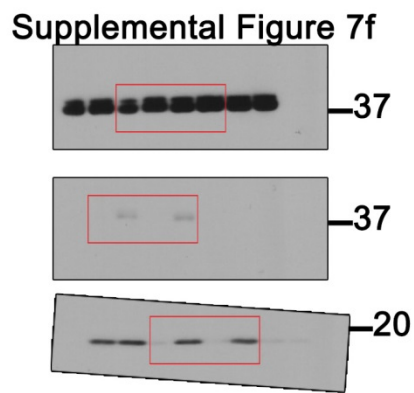

Uncropped Blots for Supplementary Figure 8

Supplementary Figure 8b

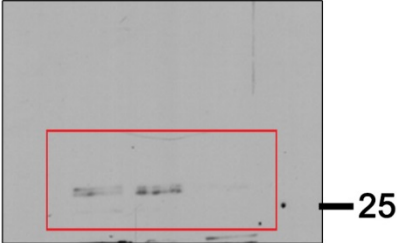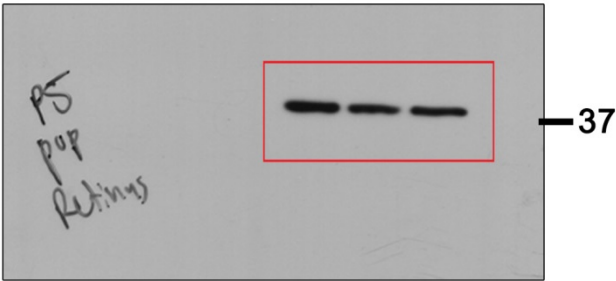

**Supplementary Table 1.** List of antibodies used for this study.

| <b>Antibody</b>                         | <b>Company</b>    | <b>IB Titer</b> | <b>IF Titer</b> |
|-----------------------------------------|-------------------|-----------------|-----------------|
| <b>PRIMARY</b>                          |                   |                 |                 |
| $\alpha$ -tubulin                       | Sigma             | 1:10000         | -               |
| $\beta$ -actin                          | CST               | 1:10000         | -               |
| DHHC3                                   | Abcam             | 1:4000          | -               |
| DHHC3                                   | SCBT              | 1:2000          | 1:750           |
| Erk1/2 (4695)                           | CST               | 1:5000          | -               |
| p-Erk1/2 (4370)                         | CST               | 1:1000          | 1:500           |
| GM130 (ab-52649)                        | Abcam             | 1:2000          | -               |
| HA                                      | CST               | 1:5000          | -               |
| P-Histone H3 (9701)                     | CST               | 1:1000          | 1:1000          |
| LAMP1                                   | Abcam             | -               | 1:2000          |
| LYPLA1 (APT1)                           | Abcam             | 1:2000          | -               |
| PKM1/2 (3186S)                          | CST               | 1:1000          | -               |
| P-VEGFR2 Y1175 (2478)                   | CST               | 1:500           | -               |
| PECAM                                   | Abcam             | -               | 1:500           |
| Rab3a (MN1250)                          | Thermo Scientific | 1:750           | -               |
| Rab4/14 (sc-376243)                     | SCBT              | 1:1000          | -               |
| Rab5                                    | SCBT              | 1:500           | -               |
| Rab11 (sc-166912)                       | SCBT              | 1:2000          | 1:750           |
| Rab27a (sc-81914)                       | SCBT              | 1:1000          | 1:500           |
| Streptavidin HRP (N100)                 | Life Technologies | 1:5000          | -               |
| TGN46                                   | Abcam             | -               | 1:2000          |
| VE-Cadherin (sc-28644)                  | SCBT              | 1:1000          | -               |
| VEGFR1 (ab-32152)                       | Abcam             | 1:2000          | 1:500*          |
| Alexa-fluor 488-VEGFR1 (ab-195253)      | Abcam             | -               | 1:50            |
| VEGFR2 (2479)                           | CST               | 1:5000          | 1:1000          |
| ZDHHC21 (ab-103755)                     | Abcam             | 1:750           | -               |
| <b>SECONDARY</b>                        |                   |                 |                 |
| Anti-mouse IgG, HRP-linked (secondary)  | CST               | 1:5000          | -               |
| Anti-rabbit IgG, HRP-linked (secondary) | CST               | 1:5000          | -               |
| Goat anti-mouse 488                     | Life Technologies | -               | 1:1000          |
| Goat anti-mouse 594                     | Life Technologies | -               | 1:1000          |
| Goat anti-rabbit 488                    | Life Technologies | -               | 1:1000          |
| Goat anti-rabbit 594                    | Life Technologies | -               | 1:1000          |

\*A titer of 1:200 was used for Flt-1 staining in the retina

Abbreviations:

CST= Cell Signaling Technologies

SCBT= Santa Cruz Biotechnology

**Supplementary Table 2.** List of Inhibitors used for this study.

| <b>Inhibitors</b>               | <b>Concentration</b>               | <b>Company</b> | <b>Target</b>                 |
|---------------------------------|------------------------------------|----------------|-------------------------------|
| 2-Bromohexadecanoic Acid (2-BH) | 20 $\mu$ M in EtOH                 | Sigma          | Palmitoyl-acetyl transferases |
| Chloroquine (CHQ)               | 10 $\mu$ g/mL in H <sub>2</sub> O  | Sigma          | Lysosome                      |
| Cycloheximide (CHX)             | 500 $\mu$ g/mL in H <sub>2</sub> O | Sigma          | Ribosome                      |
| Dynasore                        | 1 $\mu$ M in DMSO                  | Santa Cruz     | Dynamin                       |
| MG132                           | 5 $\mu$ M in DMSO                  | Calbiochem     | Proteasome                    |
| Palmostatin B (Pal-B)           | 10 $\mu$ M in DMSO                 | Calbiochem     | Acyl-protein thioesterases    |

**Supplementary Table 3.** List of small interfering RNA knockdown probes used for this study.

| siRNAs        | Catalogue # | Company      | Pmol/10 <sup>6</sup> cells | Target species |
|---------------|-------------|--------------|----------------------------|----------------|
| APT1          | S20410      | ThermoFisher | 100                        | Human          |
| DHHC3         | S27899      | ThermoFisher | 125                        | Human          |
| DHHC3 #2      | S27900      | ThermoFisher | 125                        | Human          |
| DHHC7         | S31109      | ThermoFisher | 125                        | Human          |
| Flt-1         | SI00031465  | Qiagen       | 75                         | Human          |
| Non-targeting | SI03650318  | Qiagen       | varies                     | none           |
| Rab4a         | S11677      | ThermoFisher | 100                        | Human          |
| Rab11a        | S16702      | ThermoFisher | 100                        | Human          |
| Rab27a#1*     | SI02662744  | Qiagen       | 100                        | Human          |
| Rab27a#2**    | S11695      | ThermoFisher | -                          | Human/mouse    |
| Rab27a # 3    | S11494      | ThermoFisher | 100                        | Human/mouse    |

\*Used for all human cell work in 2D and 3D.

\*\*Used for mouse aortic ring assay (200pmol) and to validate effects of Rab27a-1 probe. Used at 100pmol/10<sup>6</sup> cell for Rab27a knockdown validation in Supplementary Figure 6d.
